26 **and biochemical differences suggesting that they may be able to adopt**  
27 **disease-specific molecular conformations<sup>6,7</sup>. Such conformers may give rise**  
28 **to different neuropathological phenotypes<sup>8,9</sup>, reminiscent of prion strains<sup>10</sup>.**  
29 **However, the underlying structures are not known. Using electron cryo-**  
30 **microscopy (cryo-EM), we recently reported the structures of tau filaments**  
31 **from Alzheimer's disease, which contain both 3R and 4R tau<sup>11</sup>. Here we**  
32 **have determined the structures of tau filaments from Pick's disease, a**  
33 **neurodegenerative disorder characterised by frontotemporal dementia.**  
34 **They consist of residues K<sub>254</sub>-F<sub>378</sub> of 3R tau, which are folded differently**  
35 **when compared to tau in Alzheimer's disease filaments, establishing the**  
36 **existence of conformers of assembled tau. The Pick fold explains the**  
37 **selective incorporation of 3R tau in Pick bodies and the differences in**  
38 **phosphorylation relative to the tau filaments of Alzheimer's disease. Our**  
39 **findings show how tau can adopt distinct folds in human brain in different**  
40 **diseases, an essential step for understanding the formation and**  
41 **propagation of molecular conformers.**

42

43 We used cryo-EM to image tau filaments extracted from the frontotemporal  
44 cortex of a patient who had a 7 year history of behavioural-variant  
45 frontotemporal dementia. Neuropathological examination revealed severe  
46 frontotemporal lobar degeneration, with abundant Pick bodies composed of 3R  
47 tau filaments, without phosphorylation of S<sub>262</sub> (Fig. 1a-d, Extended Data Fig. 1,  
48 Extended Data Table 1)<sup>12-17</sup>. As in Alzheimer's disease<sup>18</sup>, a fuzzy coat composed  
49 of the disordered N- and C-terminal regions of tau surrounded the filament cores  
50 and was removed by mild pronase treatment (Fig. 1e and Extended Data Fig. 1).

51 Narrow (93%) and wide (7%) filaments could be distinguished (Fig. 1e). The  
52 narrow filaments have previously been described as straight<sup>19-21</sup>, but they do  
53 have a helical twist with a cross-over distance of  $\sim 1000$  Å and a projected width  
54 varying from approximately 50 to 150 Å. The wide filaments have a similar  
55 cross-over distance, but their width varies from approximately 50 to 300 Å. We  
56 named them narrow and wide Pick filaments (NPFs and WPFs). Their  
57 morphologies and relative abundance match those reported in cortical biopsies  
58 from Pick's disease brain<sup>21</sup>.

59

60 Using helical reconstruction in RELION<sup>22</sup>, we determined a 3.2 Å resolution map  
61 of the ordered core of NPFs, in which side-chain densities were well resolved and  
62  $\beta$ -strands were clearly separated along the helical axis (Fig. 1f and Extended Data  
63 Fig. 2). We also determined an 8 Å resolution map of WPFs, which showed well-  
64 separated  $\beta$ -sheets perpendicular to the helical axis, but no separation of  $\beta$ -  
65 strands along the helical axis (Fig. 1g and Extended Data Fig. 3). NPFs are  
66 composed of a single protofilament with an elongated structure that is markedly  
67 different from the C-shaped protofilament of Alzheimer's disease paired helical  
68 and straight filaments (PHFs and SFs)<sup>11,23</sup>. WPFs are formed by the association of  
69 two NPF protofilaments at their distal tips. In support, we observed WPFs where  
70 one protofilament had been lost in some parts (Extended Data Fig. 3). Our results  
71 reveal that the tau filaments of Pick's disease adopt a single fold that is different  
72 from that of the tau filaments of Alzheimer's disease.

73

74 The high-resolution NPF map allowed us to build an atomic model of the Pick tau  
75 filament fold, which consists of residues K<sub>254</sub>-F<sub>378</sub> of 3R tau (in the numbering of

76 the 441 amino acid human tau isoform) (Fig. 2). There are nine  $\beta$ -strands ( $\beta$ 1-9)  
77 arranged into four cross- $\beta$  packing stacks and connected by turns and arcs (Fig.  
78 3a,b). R1 provides two strands,  $\beta$  1 and  $\beta$  2, and R3 and R4 provide three  
79 strands each,  $\beta$  3-5 and  $\beta$  6-8, respectively. These pack together in a hairpin-like  
80 fashion:  $\beta$  1 against  $\beta$  8,  $\beta$  2 against  $\beta$  7,  $\beta$  3 against  $\beta$  6 and  $\beta$  4 against  $\beta$  5.  
81 The final strand,  $\beta$  9, is formed from 9 amino acids after R4 and packs against  
82 the opposite side of  $\beta$  8. Only the interface between  $\beta$ 3 and  $\beta$ 6 is entirely  
83 hydrophobic; the other cross- $\beta$  packing interfaces are composed of both non-  
84 polar and polar side-chains.

85

86 The inter-strand connections and their interactions maintain the strand pairings  
87 and compensate for differences in strand lengths and orientations. A sharp right-  
88 angle turn at G<sub>261</sub>, between  $\beta$ 1 and  $\beta$ 2, faces a four-residue arc formed of  
89 <sup>355</sup>GSLD<sub>358</sub>, between  $\beta$  7 and  $\beta$  8, smoothly turning the chain direction at the  
90 same angle. The <sup>270</sup>PGGG<sub>273</sub> motif between  $\beta$ 2 and  $\beta$ 3 forms an omega-shaped  
91 turn that compacts the protein chain locally, but maintains its direction at either  
92 end. On the opposite side, a  $\beta$ -arc formed of E<sub>342</sub> and K<sub>343</sub>, between  $\beta$ 6 and  $\beta$ 7,  
93 creates space for this turn. In contrast, the homologous <sup>332</sup>PGGG<sub>335</sub> motif  
94 connecting  $\beta$  5 and  $\beta$  6 forms an extended  $\beta$ -spiral conformation,  
95 compensating for the shorter lengths of these strands compared to the opposing  
96  $\beta$ 3 and  $\beta$ 4, which are connected by P<sub>312</sub>. Solvent-mediated interactions may  
97 occur within the large cavity between this motif and the side-chains at the  
98 junction of  $\beta$ 3 and  $\beta$ 4. The third homologous <sup>364</sup>PGGG<sub>367</sub> motif contributes to a  
99 180° turn that allows  $\beta$  9 to pack against the other side of  $\beta$  8. Variations in the

100 height of the chain along the helical axis also help to maintain an ordered  
101 hydrogen-bonding pattern of the  $\beta$ -stranded regions (Fig 3c).

102

103 The solvent-exposed side-chains of C<sub>322</sub> and S<sub>324</sub>, together with the intervening  
104 G<sub>323</sub>, form a smooth flat surface at the hairpin-turn between  $\beta$ 4 and  $\beta$ 5. This  
105 provides the interface for the formation of WPFs by abutting of protofilaments  
106 (Extended Data Fig. 3). The distances between protofilaments at this interface  
107 would enable van der Waals interactions, but not disulfide bond formation.  
108 Stereochemically, domain-swapped tau dimers could also be accommodated  
109 within WPFs, whereby <sub>322</sub>CGSLG<sub>326</sub> motifs would run antiparallel to each other,  
110 rather than forming hairpin turns, and the resulting interior C<sub>322</sub> side-chains  
111 could form inter-chain disulfide bonds. However, the separation of the two  
112 protofilaments in the WPF reconstruction (Fig. 1g) and the observations that  
113 WPFs can lose segments of one protofilament and are stable under reducing  
114 conditions (Extended Data Fig. 3) lead us to conclude that WPFs are formed by  
115 two separate protofilaments making tight contacts at their distal tips through  
116 van der Waals interactions.

117

118 Three regions of less well-resolved density bordering the solvent-exposed faces  
119 of  $\beta$ 4,  $\beta$ 5 and  $\beta$ 9 are apparent in the unsharpened maps of both NPFs and WPFs  
120 (Fig. 1f,g). Their low-resolution suggests that they represent less ordered,  
121 heterogeneous and/or transiently occupied structures. The density bordering  $\beta$ 4  
122 is similarly located, but more extended and less-well resolved, than that found to  
123 interact with the side-chains of K<sub>317</sub>, T<sub>319</sub> and K<sub>321</sub> in Alzheimer's disease PHFs

124 and SFs<sup>11</sup>, and hypothesized to be the N-terminal  $\gamma$ EFE<sub>9</sub>, part of the discontinuous  
125 MC1 epitope<sup>24</sup>. NPFs and WPFs were labelled by MC1 (Extended Data Fig. 1).  
126  
127 It was not previously known why only 3R tau, which lacks the second  
128 microtubule-binding repeat, is present in Pick body filaments. Our results show  
129 that despite sequence homology, the structure formed by K<sub>254</sub>-K<sub>274</sub> of the first  
130 tau repeat is inaccessible to the corresponding residues from the second repeat  
131 of 4R tau (S<sub>285</sub>-S<sub>305</sub>), because of the close packing between  $\beta$ 2 and  $\beta$ 7, which  
132 cannot accommodate the bulkier side-chain of K<sub>294</sub> from 4R tau instead of T<sub>263</sub>  
133 from 3R tau, and because the site preceding the omega-like structure formed by  
134 <sub>270</sub>PGGG<sub>273</sub> cannot accommodate a C $\beta$  branched residue, such as V<sub>300</sub> from 4R tau  
135 instead of Q<sub>269</sub> from 3R tau (Extended Data Fig. 4). In addition, the smaller C<sub>291</sub>  
136 residue from 4R tau would form weaker interactions with L<sub>357</sub> and I<sub>360</sub> than  
137 those formed by I<sub>260</sub> of 3R tau. In support, tau filaments extracted from the brain  
138 of the patient with Pick's disease used for cryo-EM seeded the aggregation of  
139 recombinant full-length 3R, but not 4R, tau (Extended Data Fig. 5). Similar  
140 experiments have shown that Alzheimer's disease PHFs and SFs, whose core  
141 sequences are shared by 3R and 4R tau, can seed both types of isoform<sup>25</sup>. Such  
142 templated misfolding explains the selective incorporation of 3R tau in Pick body  
143 filaments. Pick's disease extracts have been reported to seed the aggregation of a  
144 4R tau fragment comprising the repeats (residues 244-372) with mutations  
145 P301L and V337M<sup>26</sup>. However, this tau fragment cannot form the Pick fold,  
146 which is unable to accommodate R2 and requires residues 373-378. A small  
147 amount of aggregated four-repeat tau may have accounted for the seeding  
148 activity, as suggested in a separate study<sup>8</sup>. Loss of von Economo neurons in

149 anterior cingulate and frontoinsular cortices has been reported to be an early  
150 event in Pick's disease<sup>27,28</sup>. It remains to be established how 3R tau seeds can  
151 form in cells that also express 4R tau. Alternatively, nerve cell populations may  
152 be distinguished by the tau isoforms that they express<sup>29</sup>.

153

154 To test the generality of the Pick fold, we investigated the binding of repeat-  
155 specific antibodies to tau filaments extracted from the frontotemporal cortex of  
156 eight additional cases of sporadic Pick's disease (Extended Data Table 1). By  
157 Western blotting, all samples ran as two tau bands of 60 and 64 kDa, which were  
158 detected by anti-R1, -R3 and -R4 antibodies, but not by an anti-R2 antibody,  
159 showing the presence of only 3R tau (Extended Data Fig. 6). Immunogold  
160 negative-stain electron microscopy showed that most filaments were NPFs, with  
161 a minority of WPFs, and were not decorated by the repeat-specific antibodies  
162 (Extended Data Fig. 7). This shows that the R1, R3 and R4 epitopes are  
163 inaccessible to the antibodies used, indicating that they form part of the ordered  
164 filament core. Alzheimer's disease PHFs and SFs are decorated by anti-R1 and -  
165 R2, but not by anti-R3 and -R4 antibodies, because their core is made of R3, R4  
166 and the 10 amino acids following R4<sup>11,30</sup>. These results are in good agreement  
167 with experiments using limited proteolysis and mass-spectrometry<sup>7</sup>. We  
168 conclude that the ordered core of tau filaments from Pick's disease comprises the  
169 C-terminal part of R1, all of R3 and R4, as well as 10 amino acids after R4.

170

171 Unlike Alzheimer's disease PHFs and SFs, Pick body filaments are not  
172 phosphorylated at S<sub>262</sub> and/or S<sub>356</sub> (Extended Data Fig. 1)<sup>14,16</sup>. The reasons for  
173 this differential phosphorylation are unknown. Our structure reveals that the

174 tight turn at G<sub>261</sub> prevents phosphorylation of S<sub>262</sub> in the ordered core of Pick's  
175 disease filaments, whereas the phosphorylated S<sub>262</sub> is outside the ordered core of  
176 the Alzheimer tau filament fold<sup>11</sup>. This explains the differential phosphorylation  
177 and raises the question of whether phosphorylation at S<sub>262</sub> may protect against  
178 Pick's disease.

179

180 In the Pick and Alzheimer tau filament folds, most  $\beta$ -structure residues between  
181 V<sub>306</sub> and I<sub>354</sub> align locally, as do the connecting segments of P<sub>312</sub>, <sup>332</sup>PGGG<sub>335</sub> and  
182 <sup>342</sup>EK<sub>343</sub> (Figure 3a). Almost all amino acid side-chains from this region have the  
183 same interior or solvent-exposed orientations in both folds. Exceptions are C<sub>322</sub>  
184 and D<sub>348</sub>, which cause reversed chain directions in one or other fold (Figure 3d).  
185 The side-chain of C<sub>322</sub> is interior in the Alzheimer tau filament fold, whereas it is  
186 solvent-exposed in the Pick fold. This enables the hairpin-like turn and the cross-  
187  $\beta$  packing of  $\beta$ 4 against  $\beta$ 5. The side-chain of D<sub>348</sub> is interior in the Pick tau  
188 filament fold, thereby maintaining  $\beta$ -structure from K<sub>343</sub> to I<sub>354</sub> ( $\beta$ 7), whereas it is  
189 solvent exposed in the Alzheimer fold, enabling the tight turn between  $\beta$ 5 and  $\beta$ 6,  
190 which, together with  $\beta$ 4, gives rise to a triangular  $\beta$ -helix conformation<sup>11</sup>. Such  $\beta$ -  
191 helices, previously thought to be important for propagation<sup>31</sup>, are absent from  
192 the Pick tau filament fold. The  $\beta$ -strands in G<sub>355</sub>-F<sub>378</sub> align well in both folds, but  
193 have different cross- $\beta$  packing arrangements. The solvent-exposed side-chains of  
194  $\beta$ 7 and  $\beta$ 8 in the Alzheimer fold are interior in the equivalent strands of the Pick  
195 fold ( $\beta$ 8 and  $\beta$ 9), because of different conformations of the two turn regions in  
196 R4, <sup>355</sup>GSLD<sub>358</sub> and <sup>364</sup>PGGG<sub>367</sub>. The <sup>355</sup>GSLD<sub>358</sub> motif makes a sharp right-angle  
197 turn at G<sub>355</sub> in the Alzheimer tau filament fold, but a wide turn in the Pick fold.  
198 The same sharp turn is found at the homologous site in R1 in the Pick tau



199 filament fold, whereas the same wide turn occurs at the homologous site in R3 in  
200 the Alzheimer fold (Fig. 3). This suggests that these semi-conserved turn  
201 structures may also be found in tau filament folds in other diseases. In contrast,  
202 the <sub>364</sub>PGGG<sub>367</sub> motif adopts a new conformation in the Pick fold, which reverses  
203 the chain direction and is different from both the right-angle turn that this motif  
204 forms in the Alzheimer fold and the conformations of the homologous PGGG  
205 motifs from the other repeats in both tau filament folds. The Pick and Alzheimer  
206 folds share similar secondary structure patterns, but different turn  
207 conformations result in distinct cross- $\beta$  packing.

208

209 These findings show that the ordered cores of tau filaments from Pick's disease  
210 adopt a single, novel fold of 3R tau, which is distinct from the tau filament fold of  
211 Alzheimer's disease. This suggests that different folds may account for  
212 tauopathies with 4R tau filaments, such as progressive supranuclear palsy. Our  
213 results also suggest that single, disease-specific folds may exist in tauopathies  
214 with the same tau filament isoform composition, such as progressive  
215 supranuclear palsy and corticobasal degeneration, since identical tau sequences  
216 can adopt more than one fold. Conserved secondary structure motifs and  
217 markedly different conformations at turn residues in the Alzheimer and Pick tau  
218 filament folds may form the basis for structural diversity in tau protein folds  
219 from other neurodegenerative diseases.

220

221 The identification of disease-specific folds in the ordered cores of tau filaments  
222 establishes the existence of molecular conformers. This is central to the  
223 hypothesis that conformers of filamentous tau give rise to the clinical

224 phenotypes that define distinct tauopathies, akin to prion strains. By revealing  
225 the structural basis for molecular conformers in specific diseases, our results  
226 pave the way to a better understanding of a wide range of diseases related to  
227 abnormal protein aggregation.

228

229

### 230 **Acknowledgements**

231 We thank the patients' families for donating brain tissue; M. R. Farlow for  
232 clinical evaluation; F. Epperson, R. M. Richardson and U. Kuederli for human  
233 brain collection and analysis; P. Davies, P. Seubert and M. Hasegawa for  
234 antibodies MC-1, 12E8 and TauC4, respectively; S. Chen, C. Savva and G. Cannone  
235 for support with electron microscopy; T. Darling and J. Grimmett for help with  
236 computing; W.W. Seeley and M.G. Spillantini for helpful discussions. M.G. is an  
237 Honorary Professor in the Department of Clinical Neurosciences of the  
238 University of Cambridge. This work was supported by the UK Medical Research  
239 Council (MC\_UP\_A025\_1012 to G.M., MC\_UP\_A025\_1013 to S.H.W.S. and  
240 MC\_U105184291 to M.G.), the European Union (Joint Programme-  
241 Neurodegeneration Research REfrAME to M.G. and B.F. and the Innovative  
242 Medicines Initiative 2 IMPriND, project number 115881, to M.G.), the US  
243 National Institutes of Health (grant P30-AG010133 to B.G.), the Department of  
244 Pathology and Laboratory Medicine, Indiana University School of Medicine (to  
245 B.G.) and the Alzheimer's Association Zenith Award (to R.V.).

246

247

248

249 **Contributions**

250 B.G. performed neuropathology; H.J.G. and R.V. carried out genetic analysis; B.F.  
251 extracted tau filaments; B.F. and W.Z. conducted immunolabelling; B.F. and W.Z.  
252 purified recombinant tau proteins; B.F. carried out seeded aggregation; B.F. and  
253 W.Z. performed cryo-EM; B.F., W.Z. and S.H.W.S. analysed the cryo-EM data; B.F.,  
254 W.Z., G.M. and A.M. built the atomic model; R.A.C. contributed to the inception of  
255 the study; M.G. and S.H.W.S. supervised the project; all authors contributed to  
256 writing the manuscript.

257

258 **Competing interests**

259 The authors declare no competing financial interests.

260

261 **References**

- 262 1 Goedert, M., Eisenberg, D. S. & Crowther, R. A. Propagation of tau  
263 aggregates and neurodegeneration. *Annu. Rev. Neurosci.* **40**, 189-210  
264 (2017).
- 265 2 Braak, H. & Del Tredici, K. Potential pathways of abnormal tau and alpha-  
266 synuclein dissemination in sporadic Alzheimer's and Parkinson's diseases.  
267 *Cold Spring Harb. Perspect. Biol.* **8**, a023630 (2016).
- 268 3 Jackson, S. J. *et al.* Short fibrils constitute the major species of seed-  
269 competent tau in the brains of mice transgenic for human P301S tau. *J.*  
270 *Neurosci.* **36**, 762-772 (2016).
- 271 4 Wilcock, G. K. & Esiri, M. M. Plaques, tangles and dementia. A quantitative  
272 study. *J. Neurol. Sci.* **56**, 343-356 (1982).

- 273 5 Ghetti, B. *et al.* Frontotemporal dementia caused by microtubule-  
274 associated protein tau gene (MAPT) mutations: a chameleon for  
275 neuropathology and neuroimaging. *Neuropathol. Appl. Neurobiol.* **41**, 24-  
276 46 (2015).
- 277 6 Crowther, R. A. & Goedert, M. Abnormal tau-containing filaments in  
278 neurodegenerative diseases. *J. Struct. Biol.* **130**, 271-279 (2000).
- 279 7 Taniguchi-Watanabe, S. *et al.* Biochemical classification of tauopathies by  
280 immunoblot, protein sequence and mass spectrometric analyses of  
281 sarkosyl-insoluble and trypsin-resistant tau. *Acta Neuropathol.* **131**, 267-  
282 280 (2016).
- 283 8 Clavaguera, F. *et al.* Brain homogenates from human tauopathies induce  
284 tau inclusions in mouse brain. *Proc. Natl Acad. Sci. U S A* **110**, 9535-9540  
285 (2013).
- 286 9 Narasimhan, S. *et al.* Pathological tau strains from human brains  
287 recapitulate the diversity of tauopathies in nontransgenic mouse brain. *J.*  
288 *Neurosci.* **37**, 11406-11423 (2017).
- 289 10 Collinge, J. Mammalian prions and their wider relevance in  
290 neurodegenerative diseases. *Nature* **539**, 217-226 (2016).
- 291 11 Fitzpatrick, A. W. P. *et al.* Cryo-EM structures of tau filaments from  
292 Alzheimer's disease. *Nature* **547**, 185-190 (2017).
- 293 12 Rasool, C. G. & Selkoe, D. J. Sharing of specific antigens by degenerating  
294 neurons in Pick's disease and Alzheimer's disease. *N. Engl. J. Med.* **312**,  
295 700-705 (1985).
- 296 13 Pollock, N. J., Mirra, S. S., Binder, L. I., Hansen, L. A. & Wood, J. G.  
297 Filamentous aggregates in Pick's disease, progressive supranuclear palsy,

- 298 and Alzheimer's disease share antigenic determinants with microtubule-  
299 associated protein, tau. *Lancet* **328**, 1211 (1986).
- 300 14 Probst, A., Tolnay, M., Langui, D., Goedert, M. & Spillantini, M. G. Pick's  
301 disease: hyperphosphorylated tau protein segregates to the somatoaxonal  
302 compartment. *Acta Neuropathol.* **92**, 588-596 (1996).
- 303 15 Delacourte, A. *et al.* Specific pathological tau protein variants characterize  
304 Pick's disease. *J. Neuropathol. Exp. Neurol.* **55**, 159-168 (1996).
- 305 16 Delacourte, A., Sergeant, N., Wattez, A., Gauvreau, D. & Robitaille, Y.  
306 Vulnerable neuronal subsets in Alzheimer's and Pick's disease are  
307 distinguished by their tau isoform distribution and phosphorylation. *Ann.*  
308 *Neurol.* **43**, 193-204 (1998).
- 309 17 Munoz, D. G., Morris, H. R. & Rossor, M. Pick's Disease. In  
310 *Neurodegeneration: The Molecular Pathology of Dementia and Movement*  
311 *Disorders* (eds Dickson, D. W. & Weller, R. O.) pp. 156-164 (Wiley-  
312 Blackwell, 2011).
- 313 18 Wischik, C. M. *et al.* Structural characterization of the core of the paired  
314 helical filament of Alzheimer disease. *Proc. Natl Acad. Sci. U S A* **85**, 4884-  
315 4888 (1988).
- 316 19 Rewcastle, N. B. & Ball, M. J. Electron microscopic structure of the  
317 "inclusion bodies" in Pick's disease. *Neurology* **18**, 1205-1213 (1968).
- 318 20 Schochet, S. S., Lampert, P. W. & Lindenberg, R. Fine structure of the Pick  
319 and Hirano bodies in a case of Pick's disease. *Acta Neuropathol.* **11**, 330-  
320 337 (1968).
- 321 21 Wisniewski, H. M., Coblentz, J. M. & Terry, R. D. Pick's disease. A clinical  
322 and ultrastructural study. *Arch. Neurol.* **26**, 97-108 (1972).

- 323 22 He, S. & Scheres, S. H. W. Helical reconstruction in RELION. *J. Struct. Biol.*  
324 **198**, 163-176 (2017).
- 325 23 Crowther, R. A. Straight and paired helical filaments in Alzheimer disease  
326 have a common structural unit. *Proc. Natl Acad. Sci. U S A* **88**, 2288-2292  
327 (1991).
- 328 24 Jicha, G. A., Bowser, R., Kazam, I. G. & Davies, P. Alz-50 and MC-1, a new  
329 monoclonal antibody raised to paired helical filaments, recognize  
330 conformational epitopes on recombinant tau. *J. Neurosci. Res.* **48**, 128-132  
331 (1997).
- 332 25 Guo, J. L. *et al.* Unique pathological tau conformers from Alzheimer's  
333 brains transmit tau pathology in nontransgenic mice. *J. Exp. Med.* **213**,  
334 2635-2654 (2016).
- 335 26 Sanders, D. W. *et al.* Distinct tau prion strains propagate in cells and mice  
336 and define different tauopathies. *Neuron* **82**, 1271-1288 (2014).
- 337 27 Seeley, W. W. *et al.* Early frontotemporal dementia targets neurons unique  
338 to apes and humans. *Ann. Neurol.* **60**, 660-667 (2006).
- 339 28 Miki, Y. *et al.* An autopsy case of incipient Pick's disease:  
340 immunohistochemical profile of early-stage Pick body formation.  
341 *Neuropathology* **34**, 386-391 (2014).
- 342 29 Goedert, M., Spillantini, M. G., Potier, M. C., Ulrich, J. & Crowther, R. A.  
343 Cloning and sequencing of the cDNA encoding an isoform of microtubule-  
344 associated protein tau containing four tandem repeats: differential  
345 expression of tau protein mRNAs in human brain. *Embo J.* **8**, 393-399  
346 (1989).

- 347 30 Goedert, M., Spillantini, M. G., Jakes, R., Rutherford, D. & Crowther, R. A.  
348 Multiple isoforms of human microtubule-associated protein tau:  
349 sequences and localization in neurofibrillary tangles of Alzheimer's  
350 disease. *Neuron* **3**, 519-526 (1989).
- 351 31 Wasmer, C. *et al.* Amyloid fibrils of the HET-s(218-289) prion form a beta  
352 solenoid with a triangular hydrophobic core. *Science* **319**, 1523-1526  
353 (2008).
- 354

353 **Methods**

354

355

356 **Extraction of tau filaments**

357 Sarkosyl-insoluble material was extracted from grey matter of frontal and  
358 temporal cortex of the patients' brains, as described<sup>1</sup>. The pelleted sarkosyl-  
359 insoluble material was resuspended in 50 mM Tris-HCl pH 7.4 containing  
360 150 mM NaCl and 0.02% amphipol A8-35 at 250 µl per g tissue, followed by  
361 centrifugation at 3,000 *xg* for 30 min at 4 °C. The pellets, containing large  
362 contaminants, were discarded. The supernatants were centrifuged at 100,000 *xg*  
363 for 30 min at 4 °C. The resulting pellets were resuspended in buffer at 15 µl per g  
364 tissue. Pronase treatment was carried out as described for negative-stain EM<sup>1</sup>  
365 and cryo-EM<sup>2</sup>.

366

367 **Cloning and purification of epitope-deletion recombinant tau**

368 Tau constructs lacking the BR136, Anti-4R, BR135 and TauC4 peptide sequences  
369 were cloned from pRK172 encoding wild-type 0N4R or 2N4R tau using the  
370 QuikChange Lightning site-directed mutagenesis kit (Agilent), according to the  
371 manufacturer's instructions. Recombinant proteins were purified as described<sup>3</sup>.

372

373 **Immunolabelling and histology**

374 Western blotting and immunogold negative-stain EM were carried out as  
375 described<sup>1</sup>. For Western blotting, samples were resolved on 4–20% or 10% Tris-  
376 glycine gels (Novex), and the primary antibodies were diluted in PBS plus 0.1%  
377 Tween 20 and 1% BSA. BR136 is a polyclonal antibody that was raised against a



378 synthetic peptide corresponding to residues 244-257 of tau. The peptide (200  
379 µg), coupled to keyhole limpet hemocyanin using glutaraldehyde, was mixed 1:1  
380 with Freund's complete adjuvant and used to immunise white Dutch rabbits.  
381 Booster injections using 200 µg of conjugated peptide mixed 1:1 with Freund's  
382 incomplete adjuvant were given every 2 weeks for 10 weeks following the  
383 primary immunisation. Antibodies were harvested 7 days after the final booster  
384 injection and affinity purified. Extended Data Figure 6 shows that BR136 is  
385 specific for the C-terminal region of residues 244-257. Neurohistology and  
386 immunohistochemistry were carried out as described<sup>4</sup>. Brain sections were 8 µm  
387 thick and were counterstained with haematoxylin. Detailed antibody information  
388 is provided in Extended Data Table 2.

389

### 390 **Whole exome sequencing**

391 Whole exome sequencing was carried out at the Center for Medical Genomics of  
392 Indiana University School of Medicine using genomic DNA from the nine  
393 individuals with neuropathologically confirmed diagnoses of Pick's disease, the  
394 tau filaments of which were used in Extended Data Figures 6 and 7. Target  
395 enrichment was performed using the SureSelectXT human all exon library (V6,  
396 58Mb, Agilent) and high-throughput sequencing using a HiSeq4000 (2x75bp  
397 paired-end configuration, Illumina). Bioinformatics analyses were performed as  
398 described<sup>5</sup>. Findings on *MAPT*, *PSEN1* and *APOE* are presented in Extended Data  
399 Table 1.

400

401

402

403 **Seeded aggregation**

404 Seeded aggregation was carried out as described<sup>6</sup>, but with full-length wild-type  
405 tau protein and without the aggregation inducer heparin. Recombinant 0N3R  
406 and 0N4R tau were purified as described<sup>3</sup>. Extracted tau filaments (15  $\mu$ l per g  
407 tissue) were diluted 1:10 in 10 mM HEPES pH7.4, 200 mM NaCl; 2  $\mu$ l was added  
408 to 98  $\mu$ l of 20  $\mu$ M 0N3R or 0N4R recombinant tau in the same buffer with 10  $\mu$ M  
409 thioflavin T in a black, clear bottom 96-well plate (Perkin Elmer). The plate was  
410 sealed and incubated at 37 °C in a plate reader (BMG Labtech FLUOstar Omega),  
411 with cycles of shaking for 60s (500 rpm, orbital) followed by no shaking for 60 s.  
412 Filament formation was monitored by measuring Thioflavin T fluorescence every  
413 45 min using 450 -10 nm excitation and 480 -10 nm emission wavelengths, with  
414 an instrument gain of 1100. Three independent experiments were performed  
415 with separate recombinant protein preparations.

416

417 **Electron cryo-microscopy**

418 Extracted, pronase-treated tau filaments (3  $\mu$ l at a concentration of ~0.5 mg/ml)  
419 were applied to glow-discharged holey carbon grids (Quantifoil Au R1.2/1.3, 300  
420 mesh) and plunge-frozen in liquid ethane using an FEI Vitrobot Mark IV. Images  
421 were acquired on a Gatan K2-Summit detector in counting mode using an FEI  
422 Titan Krios at 300 kV. A GIF-quantum energy filter (Gatan) was used with a slit  
423 width of 20 eV to remove inelastically scattered electrons. Fifty-two movie  
424 frames were recorded, each with an exposure time of 250 ms using a dose rate of  
425 1.06 electrons per  $\text{\AA}^2$  per frame for a total accumulated dose of 55 electrons per  
426  $\text{\AA}^2$  at a pixel size of 1.15  $\text{\AA}$  on the specimen. Defocus values ranged from -1.7 to  
427 -2.8  $\mu$ m. Further details are presented in Extended Data Table 3.

## 428 **Helical reconstruction**

429 Movie frames were corrected for gain reference, motion-corrected and dose-  
430 weighted using MOTIONCOR2<sup>7</sup>. Aligned, non-dose-weighted micrographs were  
431 used to estimate the contrast transfer function (CTF) in Gctf<sup>8</sup>. All subsequent  
432 image-processing steps were performed using helical reconstruction methods in  
433 RELION 2.1<sup>9,10</sup>. NPFs and WPFs were picked manually and processed as separate  
434 datasets.

435

### 436 ***NPF dataset***

437 NPF segments were extracted using a box size of 270 pixels and an inter-box  
438 distance of ~10% of the box size. Reference-free 2D classification was performed  
439 using a regularization value of  $T = 2$ , and segments contributing to suboptimal 2D  
440 class averages were discarded. An initial helical twist of  $-0.73^\circ$  was estimated  
441 from the crossover distances of NPFs in micrographs, and the helical rise was  
442 estimated to be 4.7 Å. Using these values, an initial 3D reference was  
443 reconstructed *de novo* from 2D class averages of segments comprising an entire  
444 helical cross-over. A first round of 3D classification, starting from the *de novo*  
445 initial model low-pass filtered to 40 Å, with local optimization of the helical twist  
446 and rise, and a regularization value of  $T = 4$  yielded a reconstruction in which  
447 individual  $\beta$ -sheets perpendicular to the helical axis were clearly separated, but  
448 no structure was discernable along the helical axis. Subsequently, 3D auto-  
449 refinement with optimization of helical twist and rise and a regularization value  
450 of  $T = 10$  was performed using the segments that contributed to the 3D class  
451 displaying  $\beta$ -sheets. The resulting reconstruction showed clearly discernable  $\beta$ -  
452 strand separation.

453 An additional round of 3D classification with a regularization value of  $T = 10$   
454 starting from the 5 Å low-pass filtered map from the previous auto-refinement  
455 was used to further select segments for a final high-resolution refinement. In  
456 total, 16,097 segments contributed to the final map. The reconstruction obtained  
457 with this relatively small subset of the initial dataset matched lower-resolution  
458 reconstructions obtained with larger subsets of the data, indicating that image  
459 classification did not select for a specific structure from a conformationally  
460 heterogeneous dataset, but instead was successful in distinguishing the  
461 segments with high-resolution information from images of varying quality. This  
462 is in line with observations in single-particle analysis<sup>11</sup>. Superimposing the  
463 selected segments onto the original micrographs further confirmed this. Image  
464 classification also did not separate filaments with variable twists; instead,  
465 RELION combines segments from filaments with variable twists into a single 3D  
466 reconstruction and reduces the corresponding blurring effects by only using the  
467 central part of an intermediate asymmetrical reconstruction for real-space  
468 helical symmetrisation<sup>10</sup>. We used a 10% value for the corresponding helical  
469 `z_percentage` parameter.

470

471 Optimization of the helical twist and rise converged onto  $-0.75^\circ$  and 4.78 Å,  
472 respectively. Refinements with helical rises of multiples of 4.78 Å all led to  $\beta$ -  
473 strand separation, but in agreement with the observed absence of layer lines  
474 between 50 and 4.7 Å we were unable to detect any repeating patterns along the  
475 helical axis other than the successive rungs of  $\beta$ -strands.

476

477 The final NPF reconstruction was sharpened using standard post-processing  
478 procedures in RELION, resulting in a B-factor of  $-57 \text{ \AA}^2$  (Extended Data Table 2).  
479 Helical symmetry was imposed on the post-processed map using RELION helix  
480 toolbox<sup>10</sup>. Final, overall resolution estimates were calculated from Fourier shell  
481 correlations at 0.143 between the two independently refined half-maps, using  
482 phase-randomization to correct for convolution effects of a generous, soft-edged  
483 solvent mask<sup>12</sup>. The overall resolution estimate of the final map was 3.2  $\text{\AA}$ . Local  
484 resolution estimates were obtained using the same phase-randomization  
485 procedure, but with a soft spherical mask that was moved over the entire map.

486

#### 487 ***WPF dataset***

488 The WPF dataset was down-scaled to a pixel size of 3.45  $\text{\AA}$  and segments were  
489 extracted using a box size of 180 pixels and an inter-box distance of  $\sim 10\%$  of the  
490 box size. As with the NPF dataset, an initial 3D reference was reconstructed *de*  
491 *novo* from 2D class averages of segments comprising an entire helical cross-over.  
492 3D classification was then performed to discard suboptimal segments. 3D auto-  
493 refinement of the best class with a regularization value of  $T = 4$  and a fixed  
494 helical rise and twist of 4.7  $\text{\AA}$  and  $-0.6^\circ$ , respectively, led to a 3D structure with  
495 good separation of  $\beta$ -sheets perpendicular to the helical axis, but no structure  
496 was discernable along the helical axis. The cross-section of this map clearly  
497 revealed the presence of two NPF protofilaments. To further improve the  
498 reconstruction, we also made an initial model by placing two NPF maps, rotated  
499  $180^\circ$  relative to each other in the WPF reconstruction, and low-pass filtering the  
500 resulting map to 60  $\text{\AA}$ . After a second 3D auto-refinement starting from this  
501 model, the final WPF reconstruction had an estimated overall resolution of 8  $\text{\AA}$

502 and was sharpened by specifying a b-factor of  $-200 \text{ \AA}^2$  (Extended Data Table 2).

503 In total, 3,003 segments contributed to the final map.

504

### 505 **Model building and refinement**

506 A single monomer of the NPF core was built *de novo* in the  $3.2 \text{ \AA}$  resolution

507 reconstruction using COOT<sup>13</sup>. Model building was started from the distinctive

508 extended  $\beta$ -spiral conformation of the <sub>332</sub>PGGG<sub>335</sub> motif, neighbouring the large

509 histidine side chains of residues 329 and 330, and working towards the N- and C-

510 terminal regions by manually adding amino acids, followed by targeted real-

511 space refinement. This model was then translated to give a stack of three

512 consecutive monomers to preserve nearest-neighbour interactions for the

513 middle chain in subsequent refinements using a combination of real-space

514 refinement in PHENIX<sup>14</sup> and Fourier-space refinement in REFMAC<sup>15</sup>. In the latter,

515 local symmetry restraints were imposed to keep all  $\beta$ -strand rungs identical.

516 Since most of the structure adopts a  $\beta$ -strand conformation, hydrogen-bond

517 restraints were imposed to preserve a parallel, in-register hydrogen-bonding

518 pattern in earlier stages of the model building process. Side-chain clashes were

519 detected using MOLPROBITY<sup>16</sup> and corrected by iterative cycles of real-space

520 refinement in COOT and Fourier-space refinement in REFMAC. The refined

521 model of the NPF was rigid-body fitted into the WPF map. Separate NPF model

522 refinements were performed against a single half-map, and the resulting model

523 was compared to the other half-map to confirm the absence of overfitting. The

524 final model was stable in refinements without additional restraints.

525

526 **Ethical review board and informed consent**

527 The Indiana Alzheimer Disease Center studies were reviewed and approved by  
528 the Indiana University Institutional Review Board. Informed consent was  
529 obtained from the patients' next of kin.

530

531 **Data availability**

532 Cryo-EM maps and the refined atomic model will be deposited in the Electron  
533 Microscopy Data Bank and the Protein Data Bank, respectively, following  
534 acceptance of the manuscript.

535

536 **References**

- 537 1 Goedert, M., Spillantini, M. G., Cairns, N. J. & Crowther, R. A. Tau proteins of  
538 Alzheimer paired helical filaments: abnormal phosphorylation of all six  
539 brain isoforms. *Neuron* **8**, 159-168 (1992).
- 540 2 Fitzpatrick, A. W. P. *et al.* Cryo-EM structures of tau filaments from  
541 Alzheimer's disease. *Nature* **547**, 185-190 (2017).
- 542 3 Falcon, B. *et al.* Conformation determines the seeding potencies of native  
543 and recombinant Tau aggregates. *J. Biol. Chem.* **290**, 1049-1065 (2015).
- 544 4 Spina, S. *et al.* The tauopathy associated with mutation +3 in intron 10 of  
545 Tau: characterization of the MSTD family. *Brain* **131**, 72-89 (2008).
- 546 5 Farlow, J. L. *et al.* Whole-exome sequencing in familial Parkinson disease.  
547 *JAMA Neurol.* **73**, 68-75 (2016).
- 548 6 Saijo, E. *et al.* Ultrasensitive and selective detection of 3-repeat tau  
549 seeding activity in Pick disease brain and cerebrospinal fluid. *Acta*  
550 *Neuropathol.* **133**, 751-765 (2017).

- 551 7 Zheng, S. Q. *et al.* MotionCor2: anisotropic correction of beam-induced  
552 motion for improved cryo-electron microscopy. *Nat. Methods* **14**, 331-332  
553 (2017).
- 554 8 Zhang, K. Gctf: Real-time CTF determination and correction. *J. Struct. Biol.*  
555 **193**, 1-12 (2016).
- 556 9 Scheres, S. H. RELION: implementation of a Bayesian approach to cryo-EM  
557 structure determination. *J. Struct. Biol.* **180**, 519-530 (2012).
- 558 10 He, S. & Scheres, S. H. W. Helical reconstruction in RELION. *J. Struct. Biol.*  
559 **198**, 163-176 (2017).
- 560 11 Fernandez-Leiro, R. & Scheres, S. H. Unravelling biological  
561 macromolecules with cryo-electron microscopy. *Nature* **537**, 339-346  
562 (2016).
- 563 12 Chen, S. *et al.* High-resolution noise substitution to measure overfitting  
564 and validate resolution in 3D structure determination by single particle  
565 electron cryomicroscopy. *Ultramicroscopy* **135**, 24-35 (2013).
- 566 13 Emsley, P., Lohkamp, B., Scott, W. G. & Cowtan, K. Features and  
567 development of Coot. *Acta Crystallogr. D.* **66**, 486-501 (2010).
- 568 14 Adams, P. D. *et al.* PHENIX: a comprehensive Python-based system for  
569 macromolecular structure solution. *Acta Crystallogr. D.* **66**, 213-221  
570 (2010).
- 571 15 Murshudov, G. N., Vagin, A. A. & Dodson, E. J. Refinement of  
572 macromolecular structures by the maximum-likelihood method. *Acta*  
573 *Crystallogr. D.* **53**, 240-255 (1997).
- 574 16 Chen, V. B. *et al.* MolProbity: all-atom structure validation for  
575 macromolecular crystallography. *Acta Crystallogr. D.* **66**, 12-21 (2010).





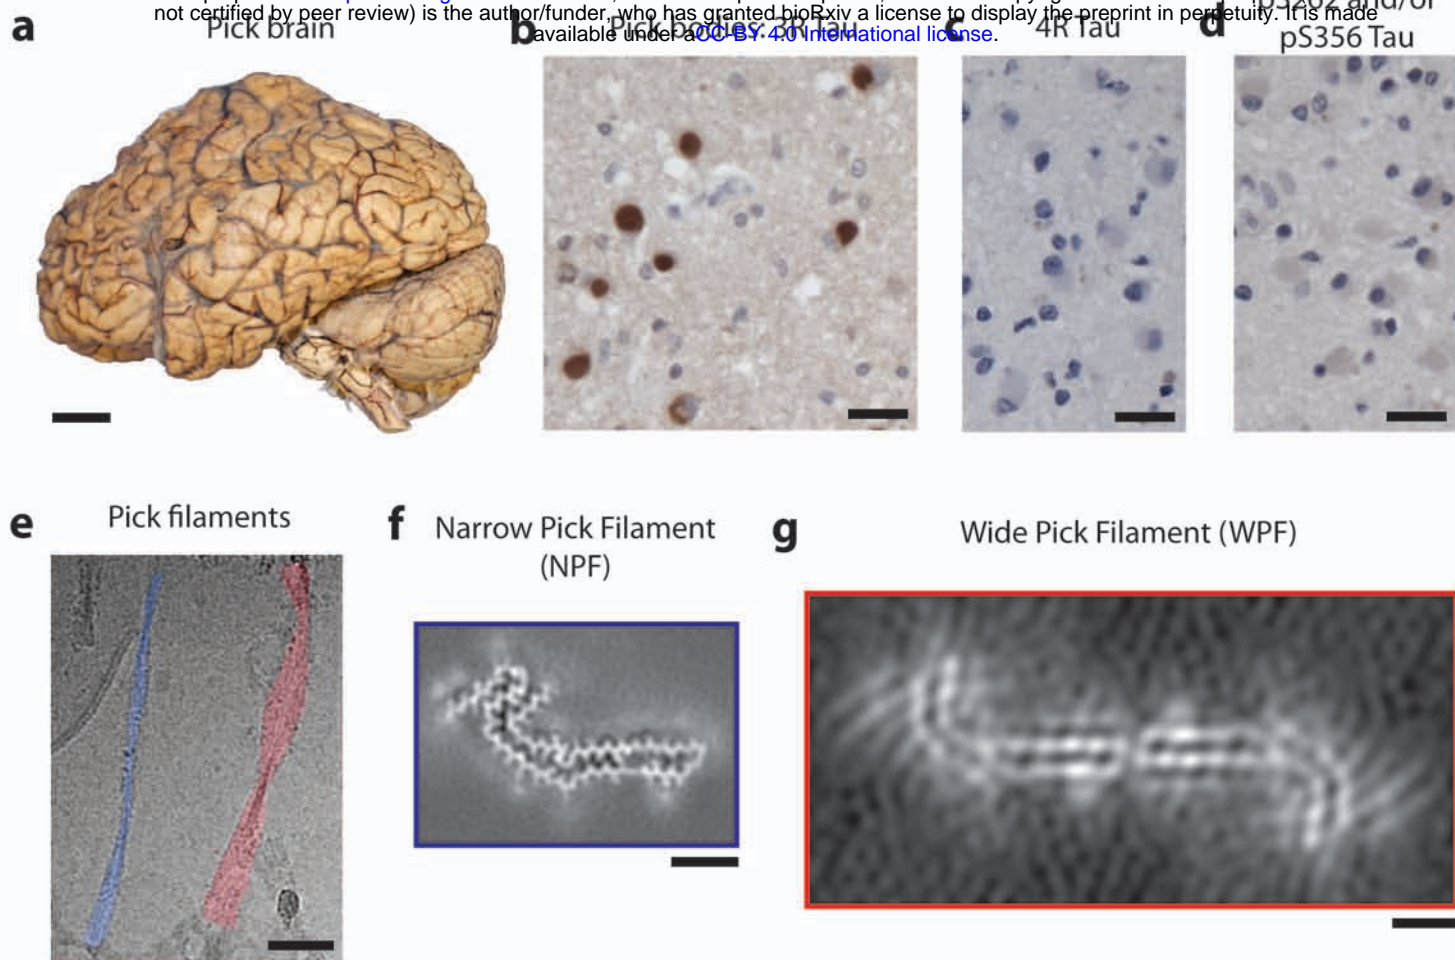

**Figure 1: Filamentous tau pathology of Pick's disease**

**a.** The brain used in this study showed atrophy of anterior frontal and temporal lobes of the cerebral cortex. Grey matter from frontotemporal cortex was used for cryo-EM. Scale bar, 5 cm **b-d.** Staining of Pick bodies in frontotemporal cortex by RD3 (3R Tau; brown) (**b.**), but not by anti-4R (4R Tau) (**c.**) or 12E8 (pS262 tau and/or pS356 tau) (**d.**). Nuclei were counterstained blue. Scale bars, 20  $\mu\text{m}$ . **e.** Cryo-electron micrograph of extracted tau filaments, in which narrow (NPFs; false coloured blue) and wide (WPFs; false coloured red) Pick filaments could be distinguished. Scale bar, 500  $\text{\AA}$  **f.** Unsharpened cryo-EM density of NPF. Scale bar, 25  $\text{\AA}$  **g.** Unsharpened cryo-EM density of WPF. Scale bar, 25  $\text{\AA}$ .

**a**

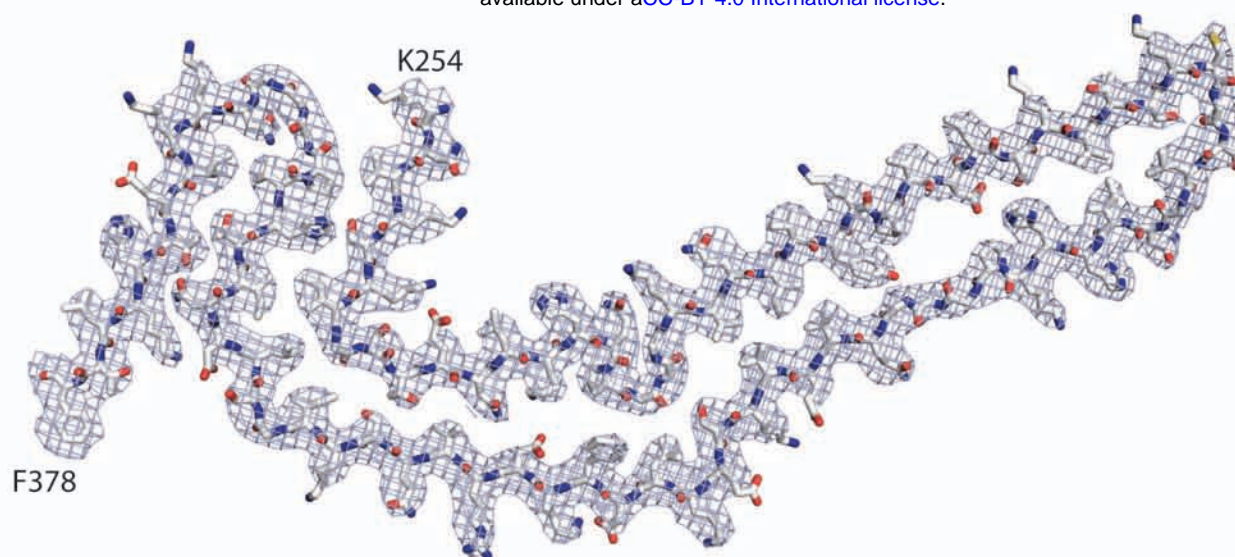

**b**

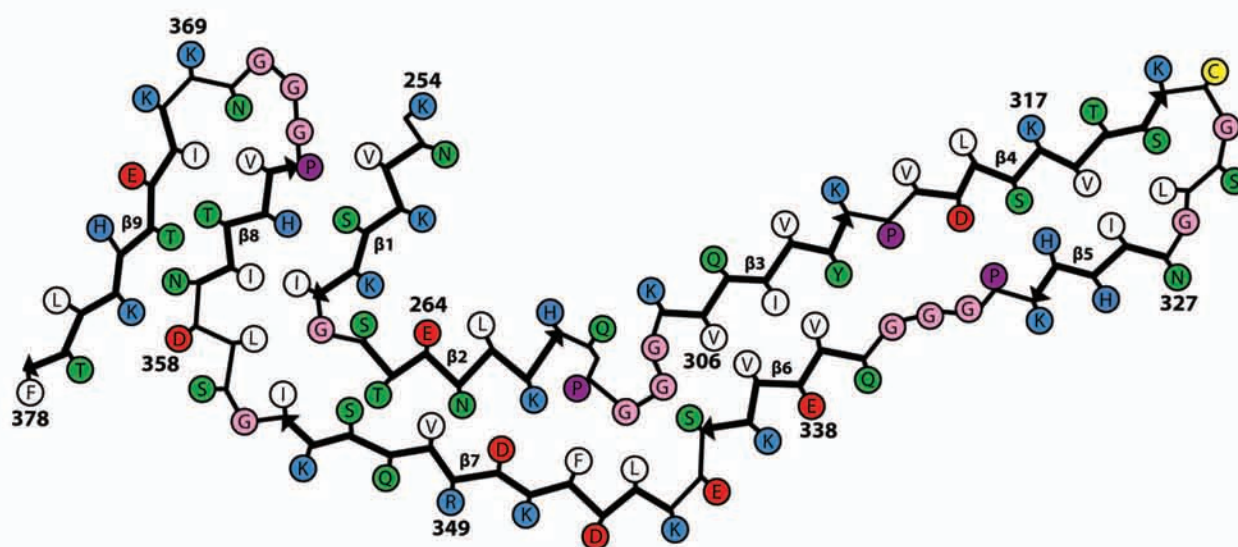

## Figure 2: The Pick tau filament fold

**a.** Sharpened, high-resolution cryo-EM map of the narrow Pick filament (NPF) with the atomic model of the Pick fold overlaid. **b.** Schematic view of the Pick fold. Amino acid numbering corresponds to the 441 amino acid human tau isoform, so residues 275-305 of R2 are not present.



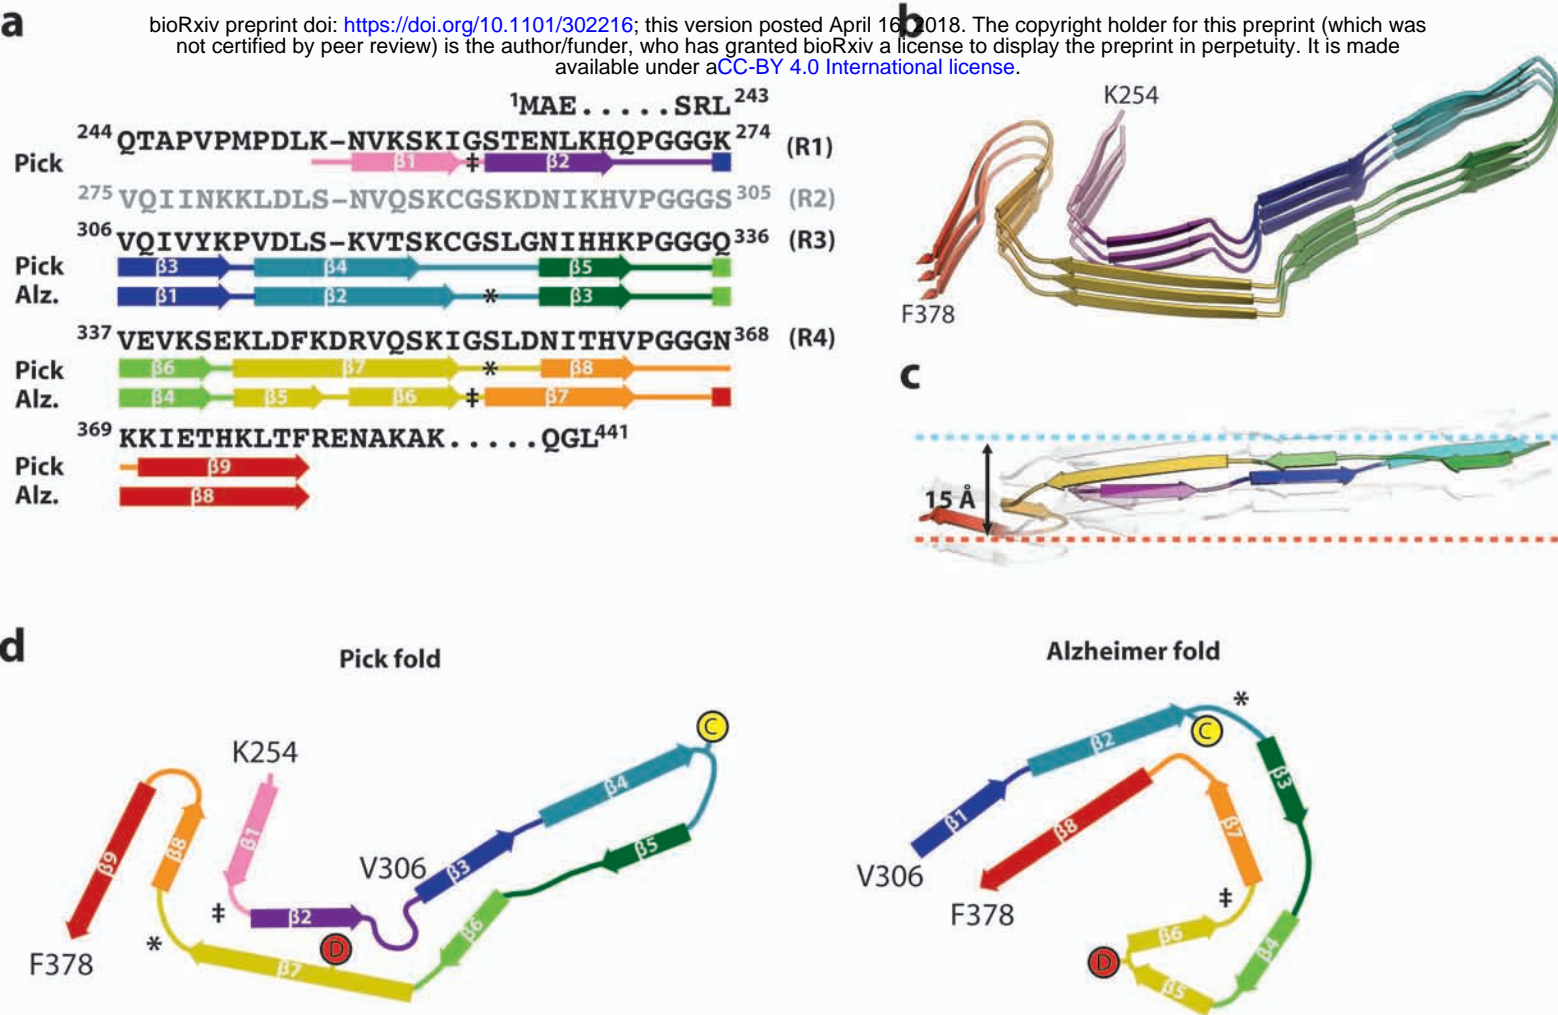

**Figure 3: Comparison of the Pick and Alzheimer tau filament folds**

a. Sequence alignment of the microtubule-binding repeats (R1–R4) with the observed nine  $\beta$ -strand regions (arrows) in the Pick fold and eight  $\beta$ -strand regions in the Alzheimer fold (arrows), coloured from violet to red. b. Rendered view of the secondary structure elements in the Pick fold, depicted as three successive rungs. c. As in b, but in a view perpendicular to the helical axis, revealing the changes in height within a single molecule. d. Schematic of the secondary structure elements in the Pick and Alzheimer folds, depicted as a single rung. The positions of C<sub>322</sub> and D<sub>348</sub> in the two folds are highlighted. The symbols ‡ and \* mark conserved turns of homologous regions in the Pick and Alzheimer folds.

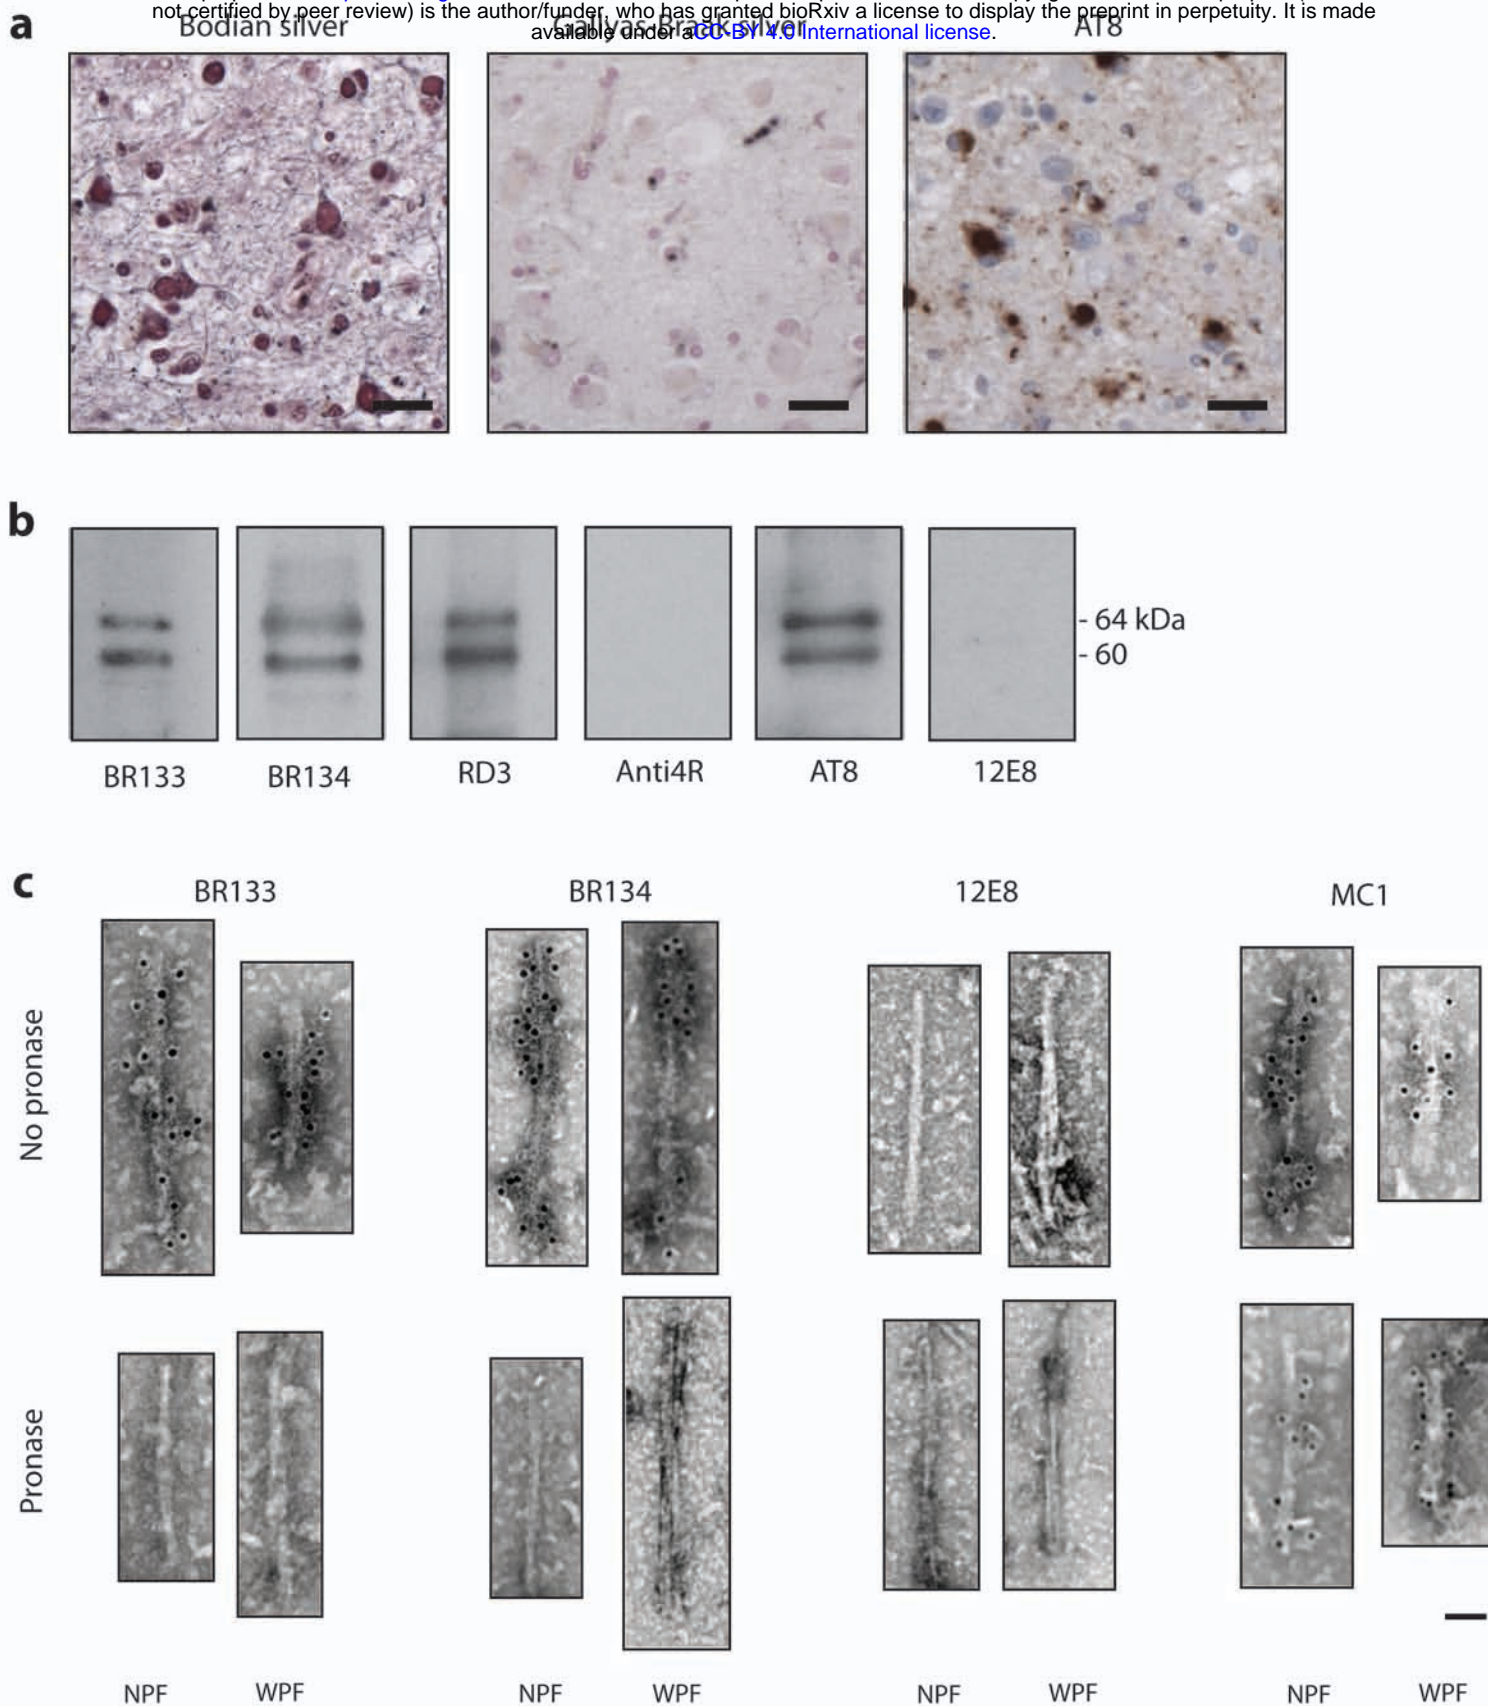

### Extended Data Figure 1: Further characterisation of the filamentous tau pathology of Pick's disease

**a.** Light microscopy of sections from the frontotemporal cortex showing staining of Pick bodies using Bodian silver and antibody AT8, but not Gallyas-Braak silver. Nuclei are counterstained blue. Scale bars, 50  $\mu$ m **b,c.** Immunolabeling of the sarkosyl-insoluble fraction from the patient's frontotemporal cortex. Immunoblots (**b**) using anti-Tau antibodies BR133 (amino-terminus), BR134 (carboxy-terminus), RD3 (3R tau), Anti-4R (4R tau), AT8 (pS202 and pT205) and 12E8 (pS262 and/or pS356). Immunogold negative-stain electron microscopy (**c**) of NPFs and WPFs with BR133, BR134, 12E8 and MC1 with and without mild pronase treatment. Scale bar, 500  $\text{\AA}$ .



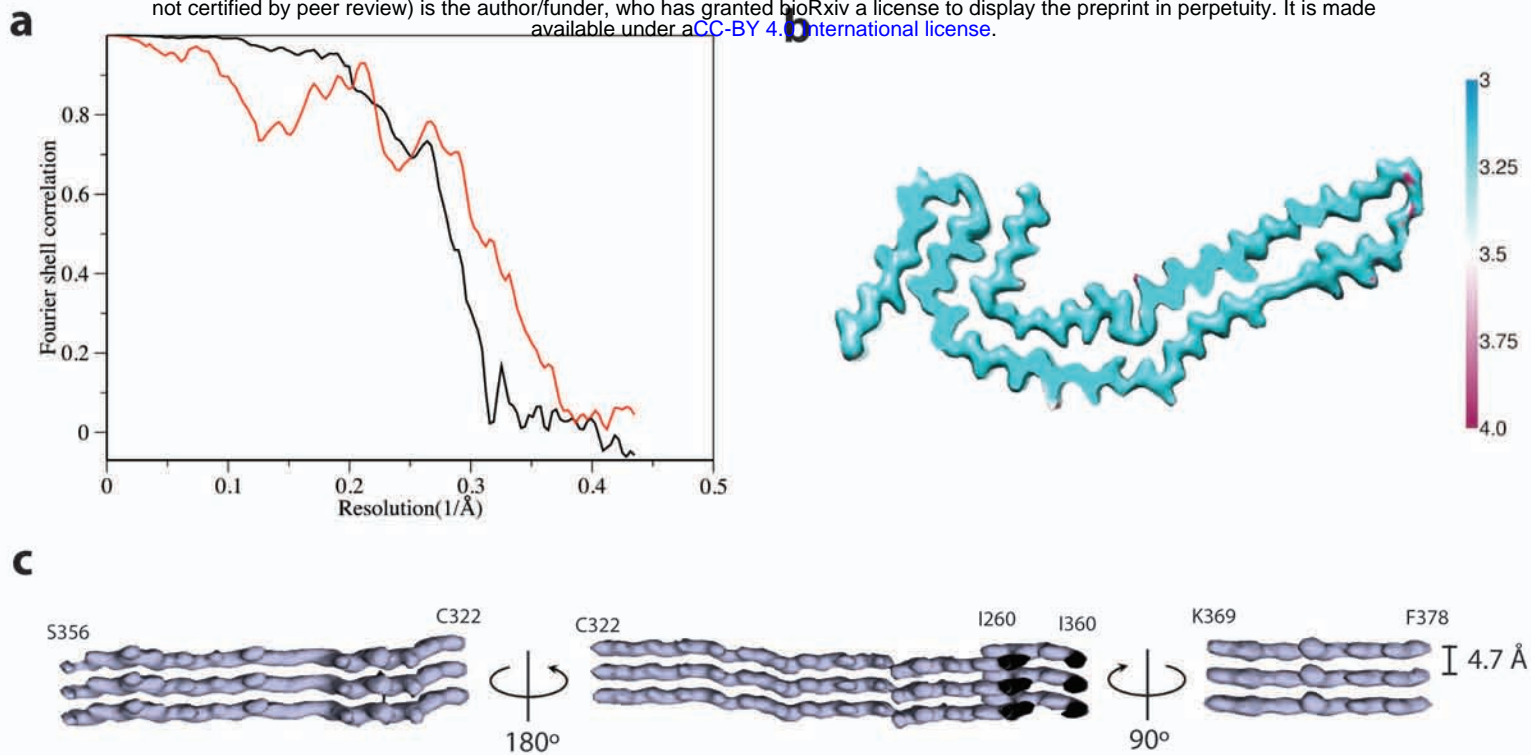

### Extended Data Figure 2: Narrow Pick filament (NPF) structure

**a.** Fourier shell correlation curves between two independently refined half-maps (black line) and between the cryo-EM reconstruction and refined atomic model (red line). **b.** Local resolution estimates for the NPF reconstruction. **c.** Helical axis views of the NPF reconstruction.

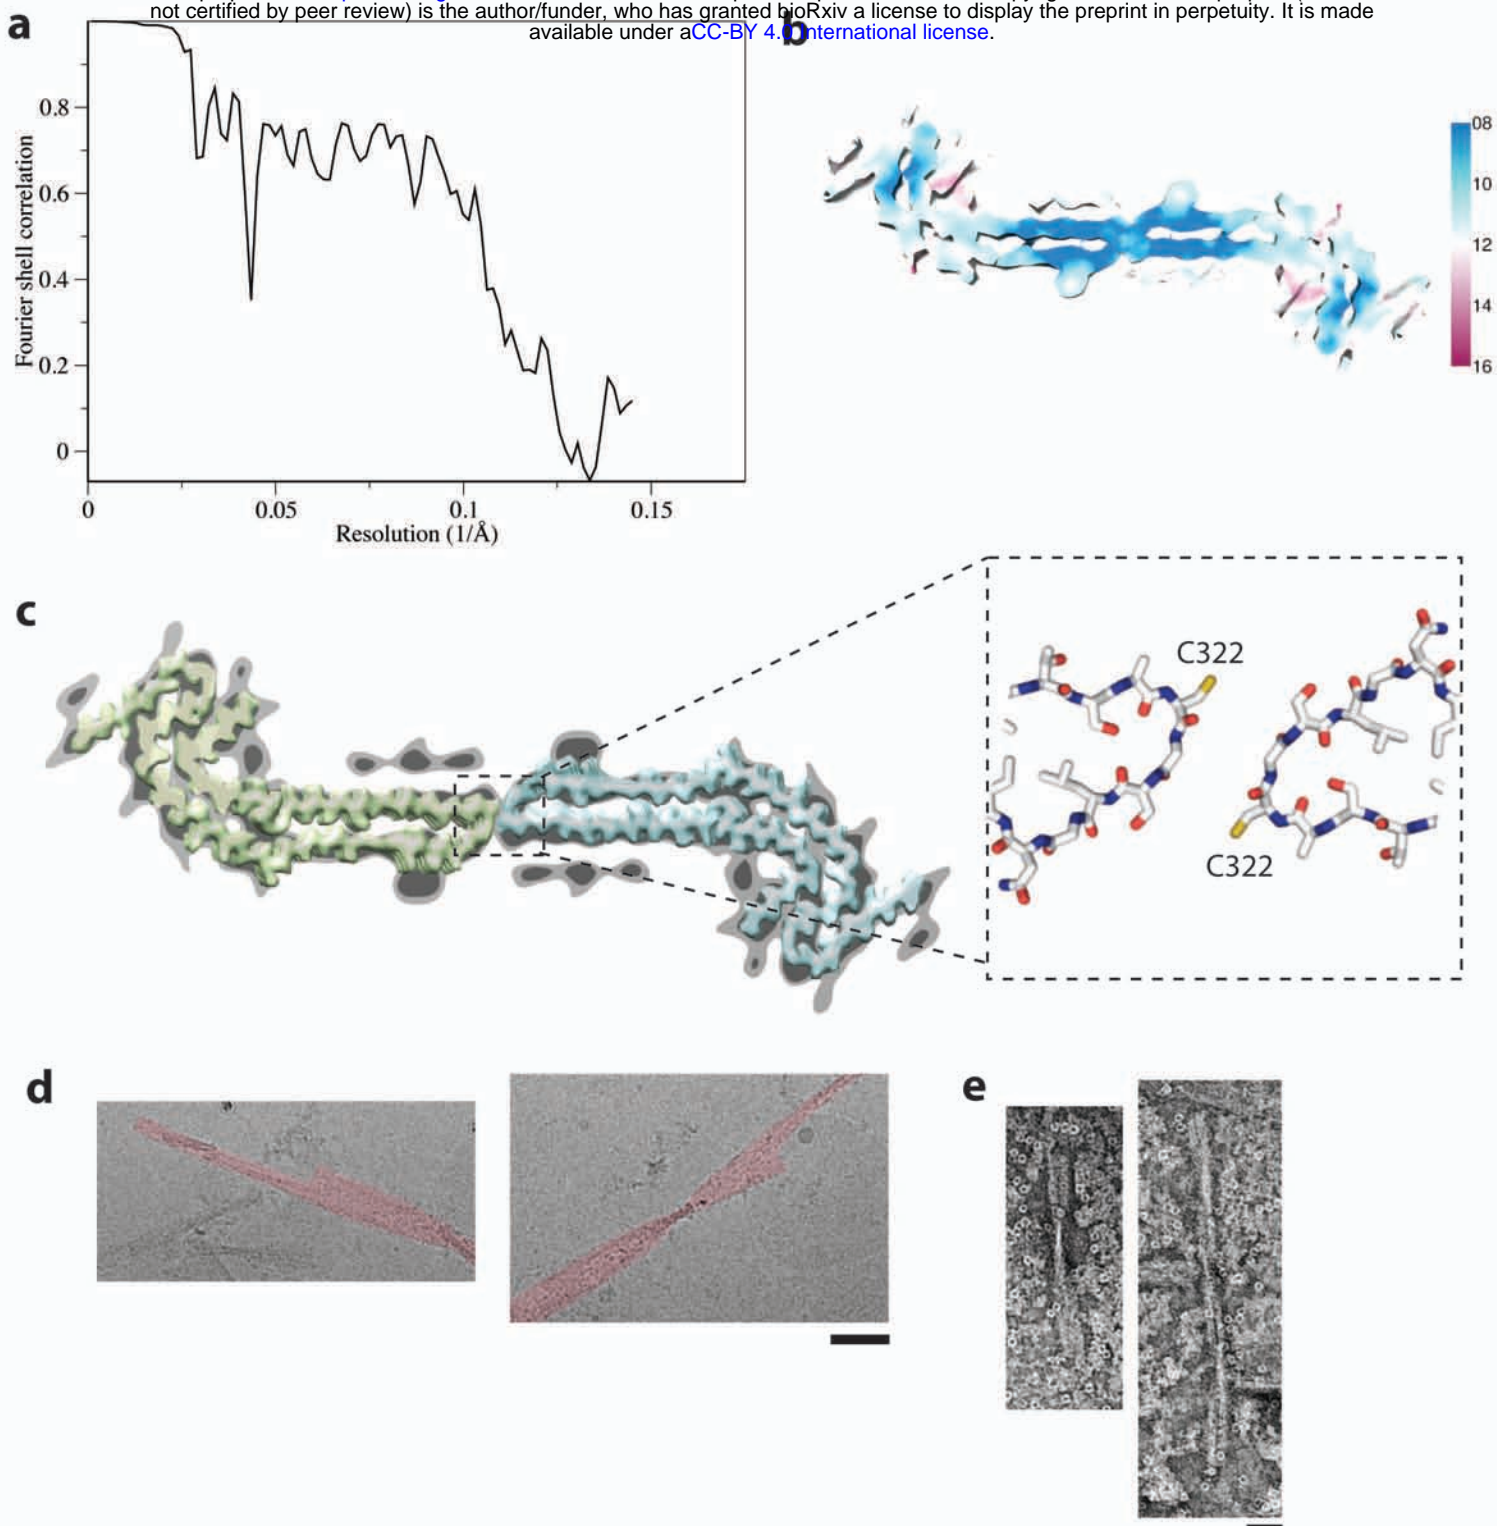

### Extended Data Figure 3: Wide Pick filament (WPF) structure

**a.** Fourier shell correlation curves between two independently refined half-maps. **b.** Local resolution estimates for the WPF reconstruction. **c.** WPF density at high (light grey) and low (dark grey) threshold with densities for two NPFs overlaid (yellow and blue). The atomic models fitted to the NPF densities in the region of the protofilament interface are shown in the boxed out area. **d.** Cryo-EM images showing WPFs (false coloured red) where segments from one of the protofilaments have been lost. Scale bar, 500 Å. **e.** Negative-stain EM images of WPFs following incubation in 100 mM dithiothreitol for 20 h. Scale bar, 500 Å.

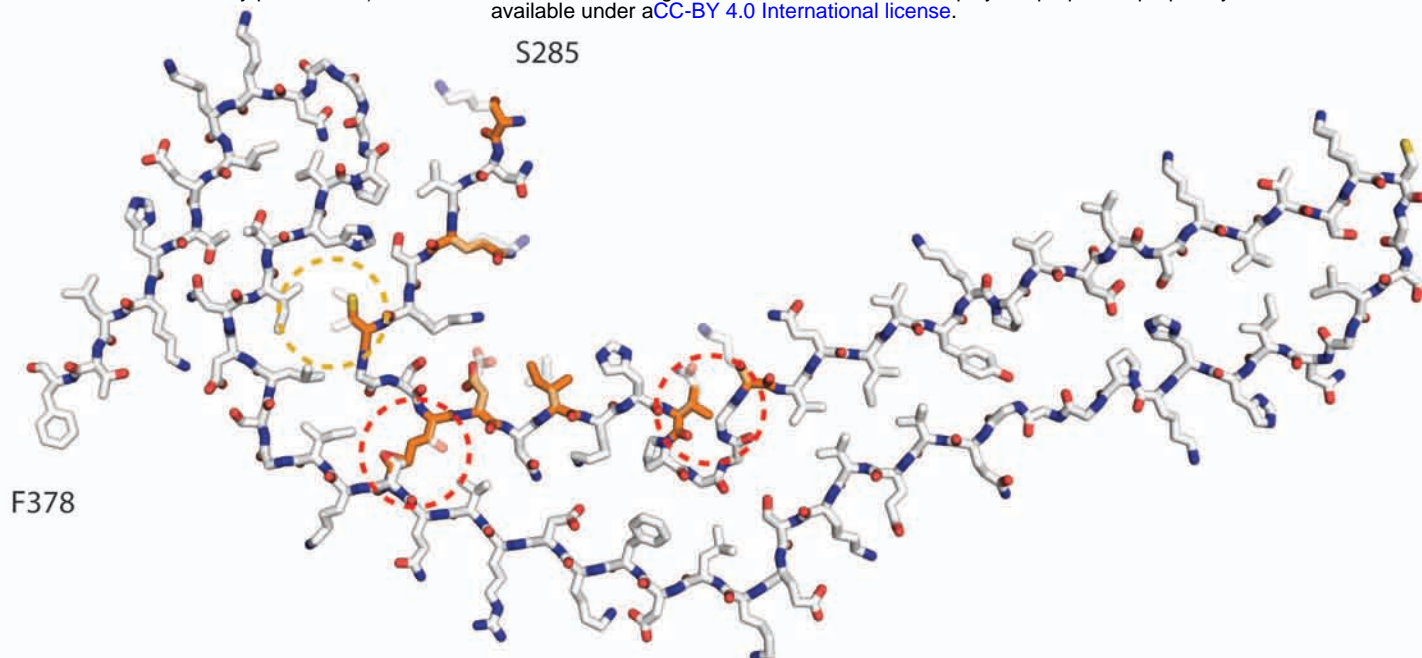

#### **Extended Data Figure 4: Incompatibility of Pick tau filament fold with 4R tau**

Atomic model of Pick fold with 4R tau sequence overlaid. The region formed by K254-K274 from R1 is replaced by the S285-V300 region from R2 in 4R tau. Residues that differ between these regions of R1 and R2 are coloured orange. The major discrepancies of lysine at position 294 in R2, instead of threonine at position 263 in R1, and valine at position 300 in R2, instead of glutamine at position 269 in R1, are highlighted with dashed red outlines. The minor discrepancy of weaker interactions of C291 of R2 with L357 and I360 than those formed by I260 of R1 is highlighted with a dashed yellow outline.



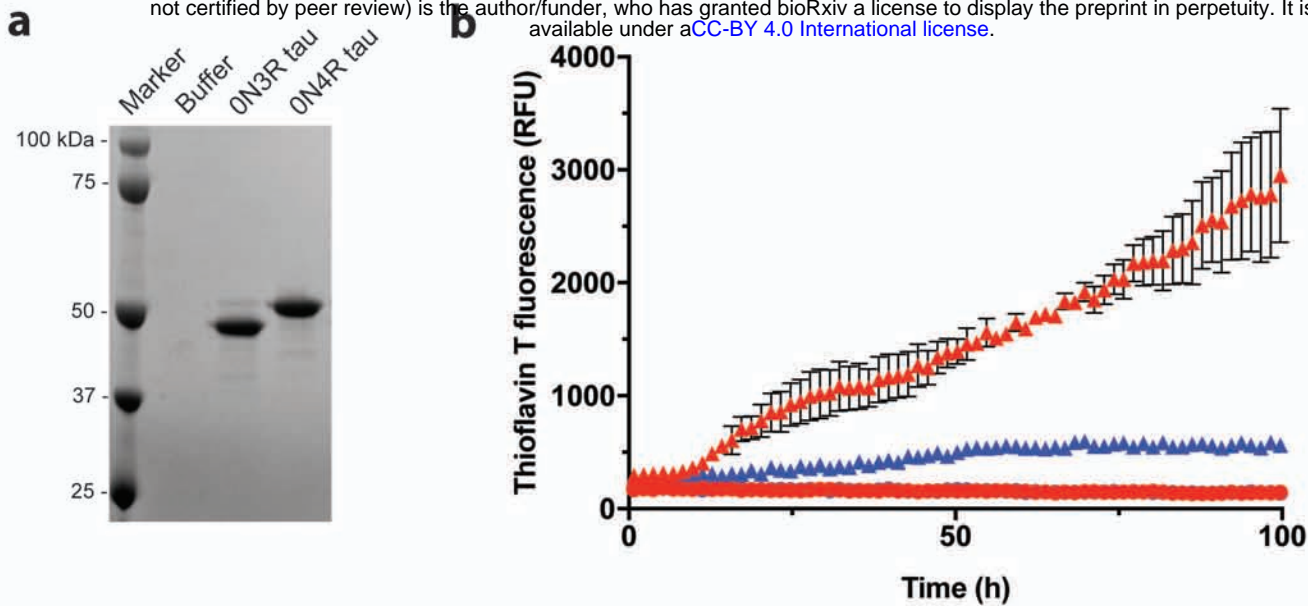

**Extended Data Figure 5: Seeded aggregation of full-length 3R, but not 4R, tau by the sarkosyl-insoluble fraction from Pick's disease brain**

**a.** Coomassie-stained SDS-PAGE of the substrates used for seeded aggregation. **b.** Thioflavin T fluorescence measurements of 0N3R (red) and 0N4R (blue) recombinant tau following incubation with (triangles) or without (circles) the sarkosyl-insoluble fraction from Pick's disease brain used for cryo-EM. The results are expressed as the means  $\pm$  SEM of three independent experiments using separate recombinant protein preparations. Error bars shorter than data point symbols are not shown. The sarkosyl-insoluble fraction from Pick's disease brain efficiently seeded the aggregation of 3R, but not 4R, tau.

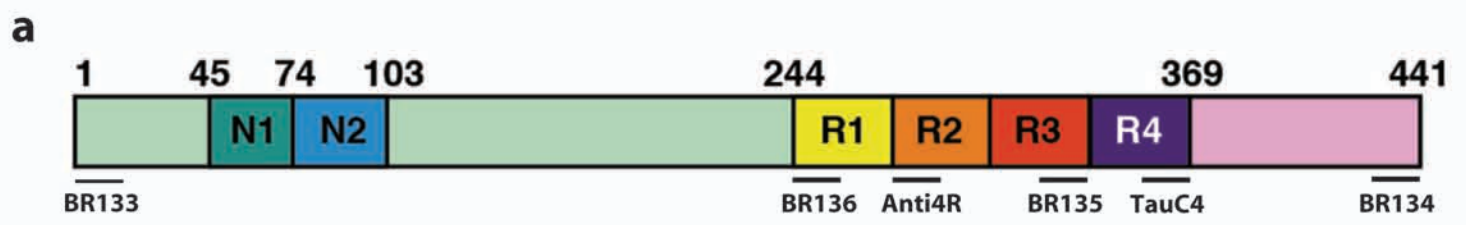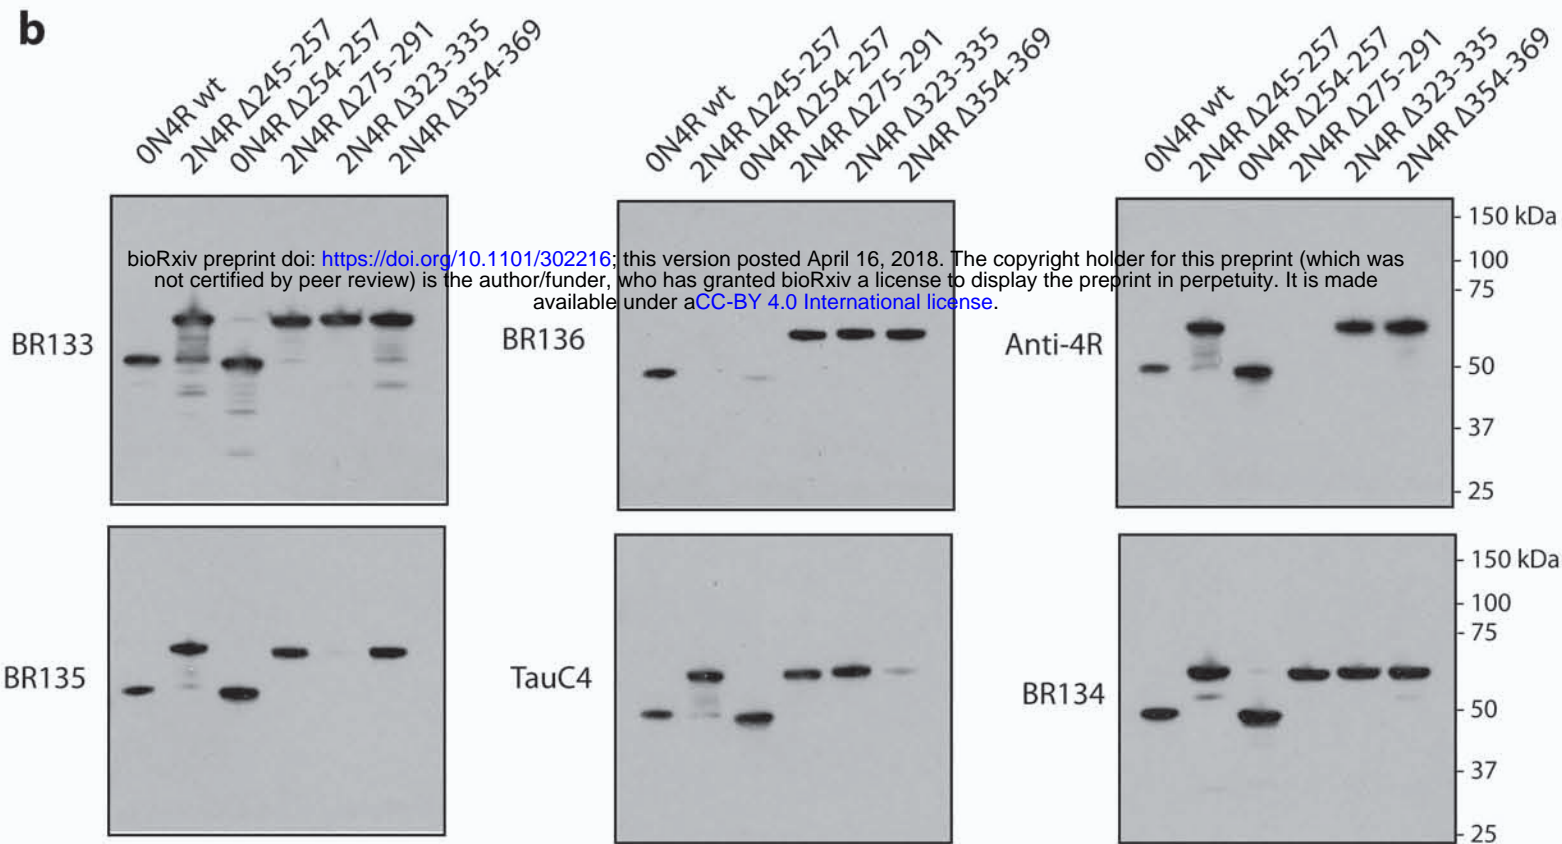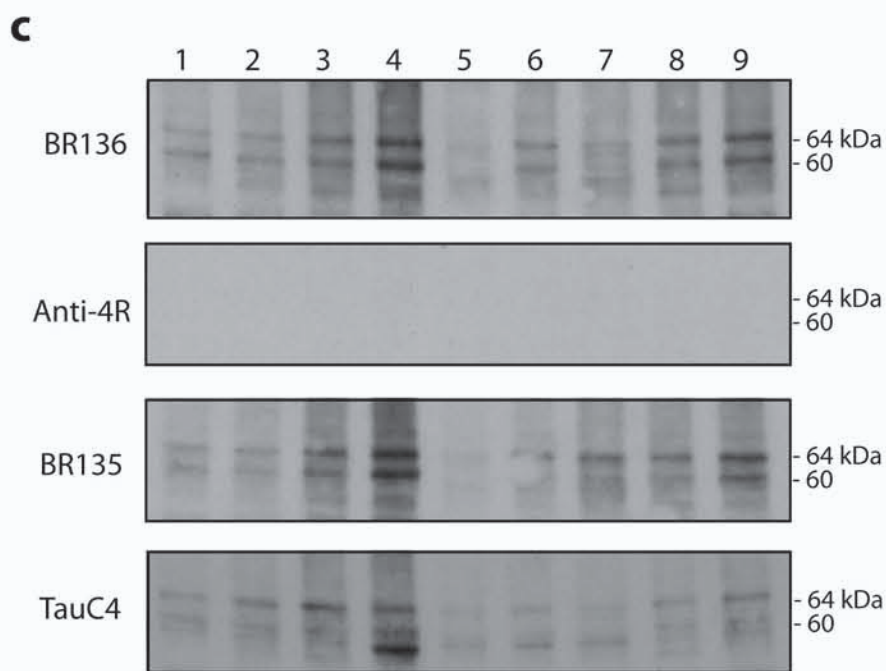

**Extended Data Figure 6: Immunoblot analysis of additional Pick's disease cases**

**a.** Diagram of 2N4R tau showing the N-terminal inserts (N1, N2), the repeats (R1-R4) and the epitopes of antibodies BR133 (N-terminus), BR136 (R1), Anti-4R (R2), BR135 (R3), TauC4 (R4) and BR134 (C-terminus). **b.** Immunoblots of epitope-deletion recombinant tau constructs with the antibodies shown in **a**. **c.** Immunoblots using the antibodies BR136, Anti-4R, BR135 and TauC4 of tau filaments extracted from frontotemporal cortex of 9 cases of Pick's disease.



**a**

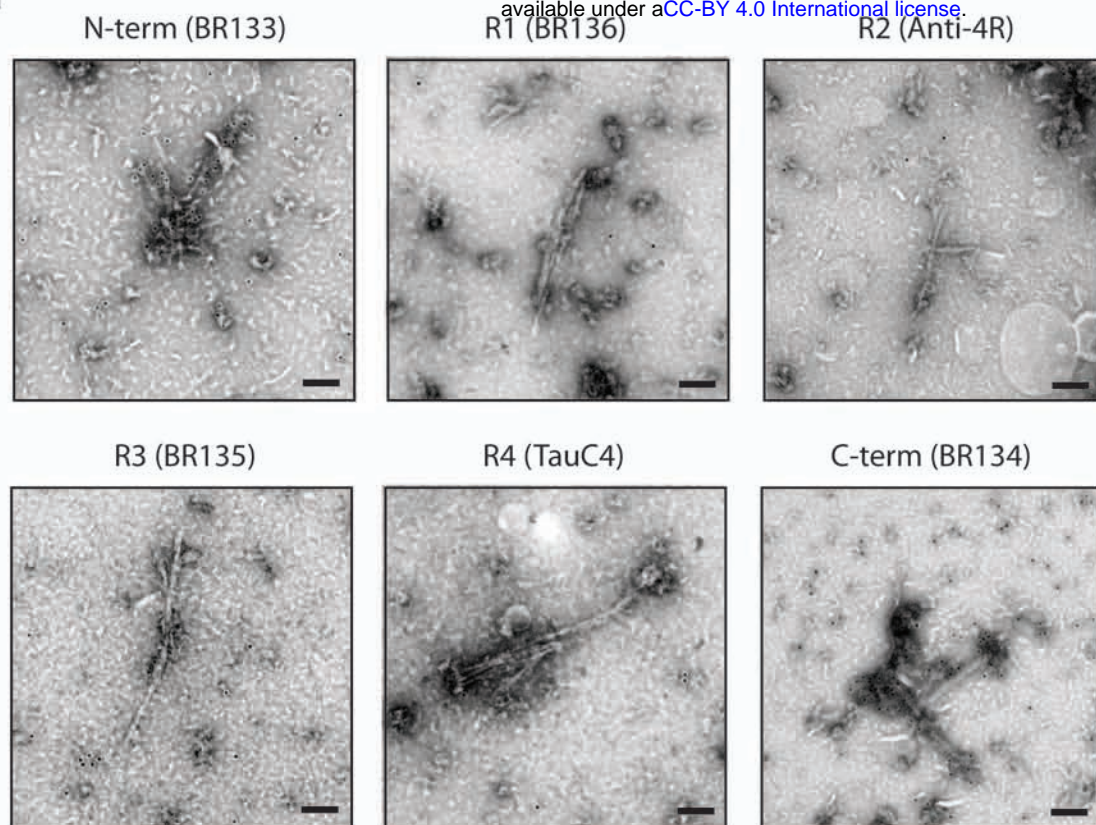

**b**

**Antibody epitopes**

|   | N-term | R1 | R2 | R3 | R4 | C-term |
|---|--------|----|----|----|----|--------|
| 1 | ✓      | ×  | ×  | ×  | ×  | ✓      |
| 2 | ✓      | ×  | ×  | ×  | ×  | ✓      |
| 3 | ✓      | ×  | ×  | ×  | ×  | ✓      |
| 4 | ✓      | ×  | ×  | ×  | ×  | ✓      |
| 5 | ✓      | ×  | ×  | ×  | ×  | ✓      |
| 6 | ✓      | ×  | ×  | ×  | ×  | ✓      |
| 7 | ✓      | ×  | ×  | ×  | ×  | ✓      |
| 8 | ✓      | ×  | ×  | ×  | ×  | ✓      |
| 9 | ✓      | ×  | ×  | ×  | ×  | ✓      |

**Extended Data Figure 7: Immunogold negative-stain EM analysis of additional Pick's disease cases**

**a.** Representative immunogold negative-stain electron microscopy of NPFs and WPFs extracted from frontotemporal cortex of Pick's disease brain (case number 4, which was also used for cryo-EM, highlighted in yellow) with antibodies against tau N-terminus (BR133), R1 (BR136), R2 (Anti4R), R3 (BR135), R4 (TauC4) and C-terminus (BR134). Scale bars, 100 nm. **b.** Table summarizing results from immunogold negative-stain electron microscopy of NPFs and WPFs extracted from frontotemporal cortex of 9 cases of Pick's disease, as in a. See Extended Data Table 1 for details of Pick's disease cases. Tick marks indicate antibody decoration of filaments, while crosses indicate that the antibodies did not decorate filaments. NPFs and WPFs were decorated by the antibodies against the N- and C-termini, but not by the repeat-specific antibodies.

| Patient | Gender | Age at death (years) | <i>MAPT</i> | <i>PSEN1</i> | <i>APOE</i> haplotypes | Post-mortem interval (h) |
|---------|--------|----------------------|-------------|--------------|------------------------|--------------------------|
| 1       | F      | 73                   | wt          | wt           | ε3/ε3                  | 23.8                     |
| 2       | F      | 70                   | wt          | wt           | ε3/ε3                  | 20.5                     |
| 3       | M      | 61                   | wt          | wt           | ε3/ε4                  | 24.5                     |
| 4       | F      | 63                   | wt          | wt           | ε2/ε3                  | 3.0                      |
| 5       | M      | 70                   | wt          | wt           | ε3/ε3                  | 14.0                     |
| 6       | M      | 65                   | wt          | wt           | ε3/ε3                  | 12.5                     |
| 7       | M      | 64                   | wt          | wt           | ε3/ε4                  | 3.0                      |
| 8       | M      | 56                   | wt          | wt           | ε3/ε4                  | 9.0                      |
| 9       | M      | 69                   | wt          | wt           | ε3/ε4                  | 4.5                      |

**Extended Data Table 1: Summary of Pick's disease patients**

Wild-type (wt) means that no known disease-causing mutations in the tau gene (*MAPT*) or the presenilin-1 gene (*PSEN1*) were detected. The patient used for cryo-EM is highlighted in yellow.

| Name    | Epitope                                          | Supplier        | Cat. number     | Species | Type       | WB dilution | EM dilution | IHC dilution | Validation                                        |
|---------|--------------------------------------------------|-----------------|-----------------|---------|------------|-------------|-------------|--------------|---------------------------------------------------|
| BR134   | N-terminus                                       | In house        | -               | Rabbit  | Polyclonal | 1:4,000     | 1:50        | -            | <sup>1</sup>                                      |
| BR133   | C-terminus                                       | In house        | -               | Rabbit  | Polyclonal | 1:4,000     | 1:50        | -            | <sup>1</sup>                                      |
| BR136   | R1                                               | In house        | -               | Rabbit  | Polyclonal | 1:4,000     | 1:50        | -            | Extended Data Fig. 6                              |
| Anti-4R | R2                                               | Cosmo Bio       | CAC-TIP-4RT-P01 | Rabbit  | Polyclonal | 1:2,000     | 1:50        | 1:100        | Manufacturer's datasheet and Extended Data Fig. 6 |
| BR135   | R3                                               | In house        | -               | Rabbit  | Polyclonal | 1:4,000     | 1:50        | -            | <sup>1</sup> and Extended Data Fig. 6             |
| Tau C4  | R4                                               | Masato Hasegawa | -               | Rabbit  | Polyclonal | 1:2,000     | 1:50        | -            | <sup>2</sup> and Extended Data Fig. 6             |
| RD3     | R1/3                                             | Millipore       | 05-803          | Mouse   | Monoclonal | 1:4,000     | -           | 1:3,000      | Manufacturer's datasheet                          |
| 12E8    | pS262 and/or pS356                               | Peter Seubert   | -               | Mouse   | Monoclonal | 1:100,000   | 1:50        | 1:1,000      | <sup>3,4</sup>                                    |
| AT8     | pS202 and pT205                                  | Thermo          | MN1020          | Mouse   | Monoclonal | 1:1,000     | 1:50        | 1:300        | Manufacturer's datasheet                          |
| MC1     | Discontinuous epitope (residues 7-9 and 313-322) | Peter Davies    | -               | Mouse   | Monoclonal | -           | 1:10        | -            | <sup>5</sup>                                      |

### Extended Data Table 2: Primary anti-tau antibodies used in this study

WB, Western blot; EM, Immunogold negative stain electron microscopy; IHC, Immunohistochemistry

- 1 Goedert, M., Spillantini, M. G., Jakes, R., Rutherford, D. & Crowther, R. A. Multiple isoforms of human microtubule-associated protein tau: sequences and localization in neurofibrillary tangles of Alzheimer's disease. *Neuron* **3**, 519-526 (1989).
- 2 Taniguchi-Watanabe, S. *et al.* Biochemical classification of tauopathies by immunoblot, protein sequence and mass spectrometric analyses of sarkosyl-insoluble and trypsin-resistant tau. *Acta Neuropathol.* **131**, 267-280 (2016).
- 3 Seubert, P. *et al.* Detection of phosphorylated Ser262 in fetal tau, adult tau, and paired helical filament tau. *J. Biol. Chem.* **270**, 18917-18922 (1995).
- 4 Litersky, J. M. *et al.* Tau protein is phosphorylated by cyclic AMP-dependent protein kinase and calcium/calmodulin-dependent protein kinase II within its microtubule-binding domains at Ser-262 and Ser-356. *Biochem. J.* **316 ( Pt 2)**, 655-660 (1996).
- 5 Jicha, G. A., Bowser, R., Kazam, I. G. & Davies, P. Alz-50 and MC-1, a new monoclonal antibody raised to paired helical filaments, recognize conformational epitopes on recombinant tau. *J. Neurosci. Res.* **48**, 128-132 (1997).

| <b>Data Collection</b>                   | <b>NPF</b>   | <b>PHF</b>             |
|------------------------------------------|--------------|------------------------|
| Magnification                            | x105,000     | x105,000               |
| Defocus range ( $\mu\text{m}$ )          | -1.7 to -2.8 | -1.7 to -2.8           |
| Voltage (kV)                             | 300          | 300                    |
| Microscope                               | Titan Krios  | Titan Krios            |
| Detector                                 | K2 Summit    | K2 Summit              |
| Frame exposure time (ms)                 | 250          | 250                    |
| Number of frames                         | 52           | 52                     |
| Total dose ( $\text{e}^-/\text{\AA}^2$ ) | 55           | 55                     |
| Pixel size ( $\text{\AA}$ )              | 1.15         | 1.15 (downscaled 3.45) |
| <b>Reconstruction</b>                    |              |                        |
| Box size (pixel)                         | 270          | 180                    |
| Inter-box distance ( $\text{\AA}$ )      | 28           | 18                     |
| Segments extracted                       | 83,475       | 8,024                  |
| Segments after Class2D                   | 46,305       | -                      |
| Segments after Class3D                   | 16,097       | 3,003                  |
| Resolution ( $\text{\AA}$ )              | 3.2          | 8                      |
| B-factor ( $\text{\AA}^2$ )              | -57          | -200                   |
| Helical Rise ( $\text{\AA}$ )            | 4.78         | 4.7                    |
| Helical twist ( $^\circ$ )               | -0.75        | -0.6                   |

**Extended Data Table 3: Cryo-electron microscopy structure determination**
